# Supplementary material
Source: Springer Nature journal article supplement (https://www.springermedizin.de/resource/supplementary/12963_2011_154_MOESM15_ESM.pdf/9572774)

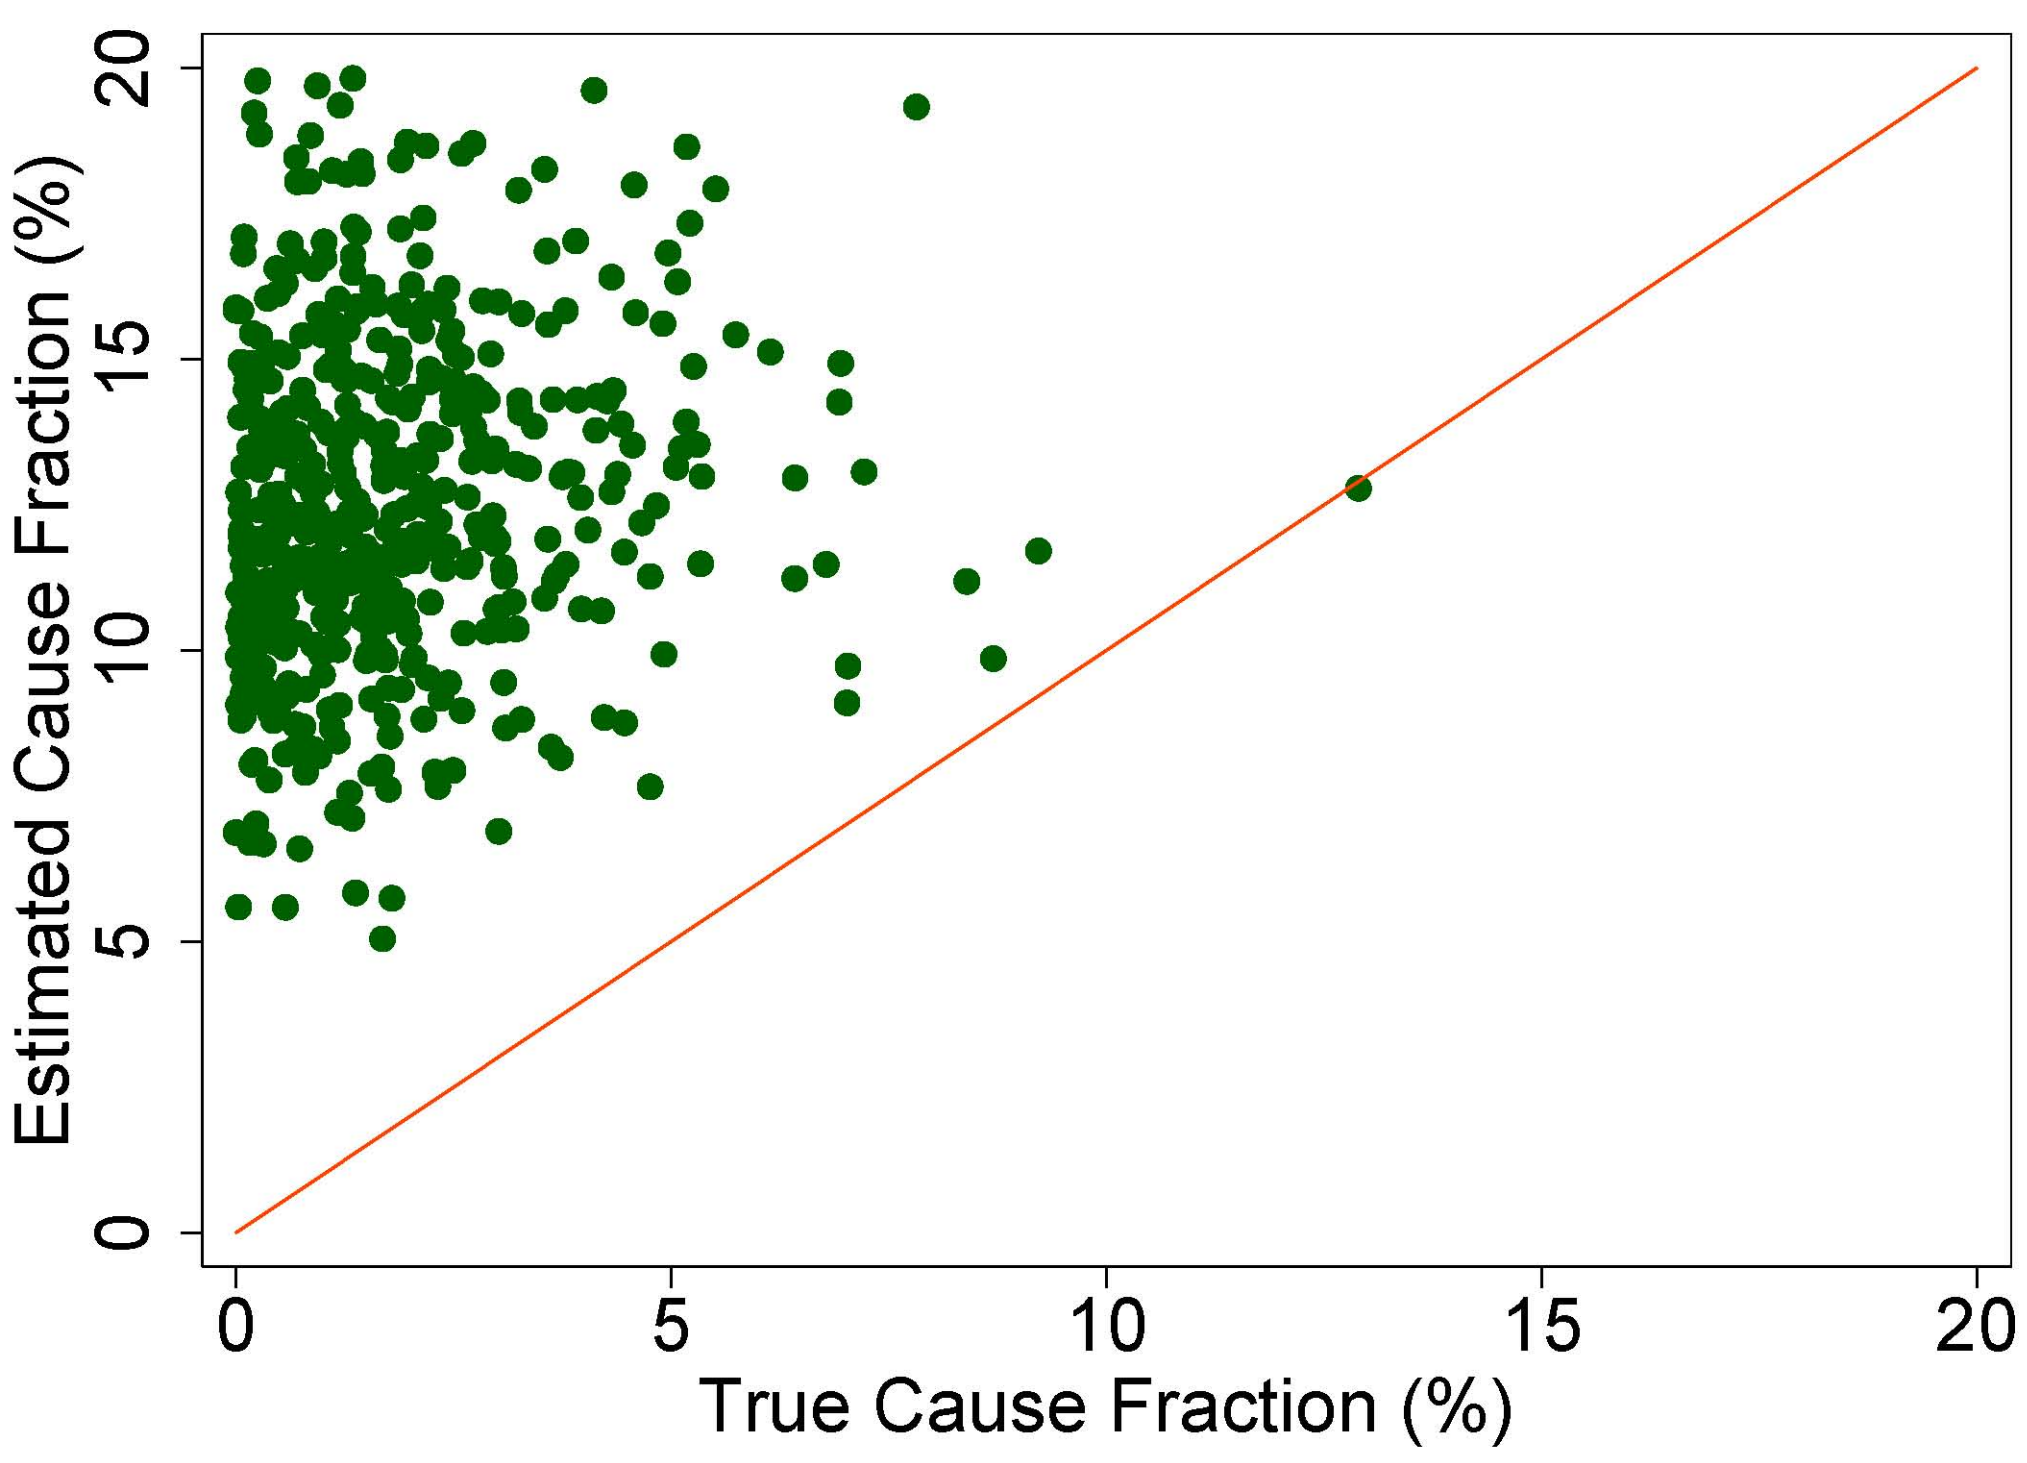

Supplement: MOESM15 [file 9572774]
